1 **Extracellular SPARC improves cardiomyocyte contraction**  
2 **during health and disease**

3

4

5 Sophie Deckx<sup>a,b,¶</sup>, Daniel M Johnson<sup>b,c</sup>, Marieke Rienks<sup>a,d</sup>, Paolo Carai<sup>a,c</sup>,  
6 Elza Van Deel<sup>e</sup>, Jolanda Van der Velden<sup>e</sup>, Karin R Sipido<sup>c</sup>, Stephane  
7 Heymans<sup>a,b,¶</sup>, Anna-Pia Papageorgiou<sup>a,b,¶\*</sup>

8

9 ¶Authors contributed equally

10 <sup>a</sup> Department of Cardiology, Maastricht University, 6202 Maastricht, The  
11 Netherlands

12 <sup>b</sup> Department of Cardiovascular Sciences, KU Leuven, 3000 Leuven, Belgium

13 <sup>c</sup> Institute of Cardiovascular Sciences, University of Birmingham,  
14 Birmingham, UK

15 <sup>d</sup> King's British Heart Foundation Centre, King's College London, London, UK

16 <sup>e</sup> Department of Physiology, VUmc Amsterdam, 1081 Amsterdam, The  
17 Netherlands

18

19

20 **Running title:** SPARC improves cardiomyocyte contraction

21

22 \* Corresponding Author

23

24 Anna-Pia Papageorgiou

25 Department of Cardiology, University Hospital Maastricht

26 Universiteitssingel 50,

27 6202 AZ Maastricht

28 The Netherlands

29 Tel: +31 (0)433883347, +32 (0)16346028

30 [anna.papageorgiou@maastrichtuniversity.nl](mailto:anna.papageorgiou@maastrichtuniversity.nl)

31

32

33

## 34 **Abstract**

35 Secreted protein acidic and rich in cysteine (SPARC) is a non-structural extracellular matrix  
36 protein that regulates interactions between the matrix and neighboring cells. In the  
37 cardiovascular system, it is expressed by cardiac fibroblasts, endothelial cells, and in lower  
38 levels by ventricular cardiomyocytes. SPARC expression levels are increased upon  
39 myocardial injury and also during hypertrophy and fibrosis. We have previously shown  
40 that SPARC improves cardiac function after myocardial infarction by regulating post-  
41 synthetic procollagen processing, however whether SPARC directly affects cardiomyocyte  
42 contraction is still unknown. In this study we demonstrate a novel inotropic function for  
43 extracellular SPARC in the healthy heart as well as in the diseased state after myocarditis-  
44 induced cardiac dysfunction. We demonstrate SPARC presence on the cardiomyocyte  
45 membrane where it is co-localized with the integrin-beta1 and the integrin-linked kinase.  
46 Moreover, extracellular SPARC directly improves cardiomyocyte cell shortening *ex vivo*  
47 and cardiac function *in vivo*, both in healthy myocardium and during coxsackie virus-  
48 induced cardiac dysfunction. In conclusion, we demonstrate a novel inotropic function for  
49 SPARC in the heart, with a potential therapeutic application when myocyte contractile  
50 function is diminished such as that caused by a myocarditis-related cardiac injury.

51

52

53 **Keywords:** Cardiomyocyte; Contraction; Extracellular Matrix; SPARC; Viral Myocarditis;

54

## 55 **Introduction**

56 In the heart, secreted protein acidic and rich in cysteine (SPARC) is expressed by  
57 endothelial cells, fibroblasts and in lower amounts by cardiomyocytes [1,2]. SPARC is a  
58 collagen- and calcium- binding protein that belongs to the group of matricellular proteins.  
59 Matricellular proteins are matrix components characterized by (1) their counter-adhesive  
60 properties, (2) low expression levels during normal physiology but increased expression  
61 during stress and (3) the non-lethal phenotypes of knockout mice [2–4]. As typical of  
62 matricellular proteins, SPARC secretion occurs upon injury and at sites of remodeling in  
63 the heart. Previously, our group has shown that SPARC can improve clinical outcome after  
64 myocardial infarction by regulating the post-synthetic procollagen processing during  
65 fibrosis [5]. We showed how overexpression of SPARC could lead to an improved survival  
66 and increased cardiac contraction, as measured by echocardiography, after myocardial  
67 infarction in mice. Surprisingly, also in sham-operated mice, an increase in cardiac  
68 fractional shortening (FS) and ejection fraction was seen when SPARC was overexpressed.  
69 Yet whether SPARC directly affected cardiomyocyte contraction remained undetermined  
70 [5]. Therefore, the main aim of the present study was to investigate the potential  
71 inotropic function for SPARC in the healthy heart. Furthermore, as compromised cardiac  
72 contractile function is a hallmark of multiple cardiac diseases, we were also interested to  
73 investigate the therapeutic potential of SPARC in these conditions. For these reasons, a  
74 viral myocarditis (VM) model was utilized.

75

76 VM is an important inflammatory heart disease and an etiological precursor of dilated  
77 cardiomyopathy, (acute) heart failure and sudden cardiac death in young healthy  
78 individuals. Up to 60% of patients with dilated cardiomyopathy and myocarditis are virus-  
79 positive [6], yet diagnosis of VM is difficult due to its heterogeneous clinical presentation.  
80 Viral infection of the heart causes acute myocarditis, which can progress into chronic  
81 myocarditis causing cardiomyocyte damage and death, and initiation of remodeling  
82 processes such as fibrosis. All of these processes ultimately result in decreased contractile  
83 function of the heart as well as arrhythmia genesis and cardiac failure. Various viruses can  
84 cause viral myocarditis, including parvovirus B19, enteroviruses, hepatitis C virus and  
85 cytomegalovirus. The most studied are the coxsackie B viruses (CVB), which are members  
86 of the enteroviruses, and are often identified in biopsies from failing viral myocarditis  
87 hearts [7]. So far, research and development of novel therapeutic strategies for viral  
88 myocarditis has focused on processes targeting inflammation, cardiomyocyte  
89 degeneration, and fibrosis [7–9], whilst only a few studies have addressed the direct  
90 effect of viral infection on cardiomyocyte function. Importantly, viruses can also directly  
91 cause defective cardiomyocyte contraction, by time-dependently modulating numerous  
92 cardiac ion-channels, leading to alterations in action potential duration and resting  
93 membrane potential, as well as alterations in calcium loading which may contribute to  
94 viral-induced cardiac dysfunction [10–12]. Furthermore, non-structural matrix proteins in  
95 the heart can influence a myriad of processes during cardiac stress, such as inflammation,  
96 fibrosis and myocyte survival. Our group has previously demonstrated that the non-  
97 structural matrix proteins thrombospondin-2 and osteoglycin can affect inflammation,

98 fibrosis and myocyte survival of the heart during cardiac aging, pressure overload,  
99 myocardial infarction, as well as after viral myocarditis [13–17] Recently we  
100 demonstrated that SPARC protects against adverse cardiac inflammation by preserving  
101 the endothelial glycocalyx during viral myocarditis [15]. Interestingly, we found clear  
102 differences in QTc times in SPARC KO mice as compared to WT mice during infection  
103 despite similar heart rates [15]. These data, in addition to our previous observation that  
104 SPARC overexpression leads to an increase in cardiac fractional shortening (FS) and  
105 ejection fraction, led us to investigate whether extracellular SPARC can act as an inotropic  
106 agent and influence cardiomyocyte contraction in health and during disease.

107

## 108 **Materials and Methods**

### 109 **Mouse models**

110 The Animal Care and Use Committee of the University of Leuven approved all described  
111 study protocols (ECD 243/2013). All animal studies conformed to the Guide for the Care  
112 and Use of Laboratory Animals. The Committee for Experiments on Animals of KU  
113 Leuven University, Belgium approved experiments. Animal handling was in accordance  
114 with the European Directive for the Protection of Vertebrate Animals used for  
115 Experimental and Other Scientific Purposes (2010/63/EU). For SPARC overexpressing  
116 experiments, an adenoviral vector designed by Barker *et al.* was used[18]. Adenovirus was  
117 produced by HEK293 cells that were collected and purified as previously described [19].

118  $1 \times 10^{10}$  adenoviral PFU containing GFP or SPARC was injected into the tail of 12 week old  
119 C57Bl6 mice.

120 For viral myocarditis (VM) experiments, 3-5 week old male susceptible C3H mice (Harlan,  
121 Boxmeer, The Netherlands) were inoculated intraperitoneally with  $10^3$  or  $10^4$  PFU CVB3  
122 (Nancy Strain) or PBS. Adenoviral overexpression experiments used the adenoviral vector  
123 designed by Barker *et al.*  $1 \times 10^{10}$  adenoviral PFU containing GFP or SPARC was injected  
124 into the tail vein of 3 weeks old mice 2 weeks prior to the CVB3 inoculation. For SPARC  
125 administration experiments, mice were subcutaneously infused for 72 hours with SPARC  
126 ( $40 \mu\text{g}/\text{kg}/\text{d}$ ) or vehicle (PBS) by Alzet osmotic minipump 1003D. Pump implantation  
127 surgery was performed as previously described [20] under ketamine and xylazine  
128 anesthesia at a dose of  $100 \text{ mg}/\text{kg}$  and  $10 \text{ mg}/\text{kg}$  respectively, and all efforts were made  
129 to minimize suffering. In all experiments, mice were sacrificed by a lethal injection of  
130 ketamine and xylazine ( $100 \text{ mg}/\text{kg}$  ketamine and  $10 \text{ mg}/\text{kg}$  xylazine) intraperitoneally,  
131 plasma was collected, and hearts were removed and prepared for either myocyte  
132 isolation or histological and molecular analysis.

### 133 **Echocardiography analysis**

134 Mice were anesthetized (2% isoflurane, ecuphar) and echocardiography was performed at  
135 indicated time points by transthoracic echocardiography with a 13-MHz transducer (i13L,  
136 GE ultrasound; Horton Norway) on a Vingmed Vivid 7 scanner (GE ultrasound, Horton,  
137 Norway). LV diameters at end-diastole (EDD), and end-systole (ESD), were measured, and  
138 fractional shortening (FS) was calculated.

## 139 **Adult mouse cardiac myocyte isolation and cell shortening** 140 **experiments**

141 Mice were injected with heparin (1000 U/kg intraperitoneally) and sacrificed by a lethal  
142 injection of ketamine and xylazine (100mg/kg ketamine and 10mg/kg xylazine)  
143 intraperitoneally. The heart was excised and cannulated via the aorta. Hearts were then  
144 mounted onto a Langendorff perfusion setup and initially briefly rinsed with normal  
145 Tyrode solution, containing (mM): 137 NaCl, 5.4 KCl, 0.5 MgCl<sub>2</sub>, 1 CaCl<sub>2</sub>, 11.8 Hepes, 10  
146 2,3-Butanedione monoxime and 10 glucose, pH was adjusted to 7.4 with NaOH.  
147 Subsequently it was perfused with a Ca<sup>2+</sup>-free solution for 8 min. The Ca<sup>2+</sup>-free Tyrode  
148 solution contained (mM): 130 NaCl, 5.4 KCl, 1.2 KH<sub>2</sub>PO<sub>4</sub>, 1.2 MgSO<sub>4</sub>, 6 Hepes, 10 2,3-  
149 Butanedione monoxime, 20 glucose, and pH was adjusted to 7.2 with NaOH. Collagenase  
150 II (672Units/ml, Worthington 4176) added to the Ca<sup>2+</sup>-free solution was subsequently  
151 perfused for 8 min. The enzyme was then washed out for a further 3 mins with 0.09mM  
152 CaCl<sub>2</sub> and 50mg/ml BSA 0.18 mM CaCl<sub>2</sub>. The heart was then removed from the  
153 Langendorff perfusion setup, and the myocytes were further dissociated mechanically by  
154 gentle shaking. Ca<sup>2+</sup> was reintroduced stepwise.

155 Cell shortening was measured using video-edge detection (Ionoptix) during electrical field  
156 stimulation at 1 and 2 Hz. Field stimulation was achieved with 5 ms square pulses of  
157 constant voltage, at 20 % above threshold. The cell shortening is expressed as the  
158 fractional shortening, i.e. normalized to resting cell length,  $\Delta L/L_0 \cdot 100\%$ . During field  
159 stimulation cells were superfused with normal Tyrode solution at 37°C. [Ca<sup>2+</sup>]<sub>i</sub> was

160 measured with fluo-3, and is reported as the fluorescence normalized to baseline values,  
161 after background subtraction,  $F/F_0$ . To measure the effect of SPARC *ex vivo* on cells,  
162 recombinant SPARC (1 $\mu$ g/ml) was added to half of the freshly isolated cell suspension,  
163 while the other half was left in normal Tyrode solution. Additionally, to assess the effects  
164 of integrin-linked kinase (ILK) inhibition, CPD-22 (Calbiochem; 1 $\mu$ M) was utilized, whilst to  
165 investigate the effect of myosin light chain kinase (MLCK) inhibition, ML-7 was used  
166 (Sigma Aldrich; 3  $\mu$ M). For all of the above interventions myocytes were incubated with  
167 the specific agent(s) for 1 hour and then cell shortening was measured as described  
168 above.

## 169 **In vitro experiments with adult rat cardiac myocytes**

170 Cardiac myocytes were isolated by enzymatic dissociation from adult Wistar rat hearts as  
171 previously described [21]. Experiments were performed in accordance with the Guide for  
172 the Animal Care and Use Committee of the VU University Medical Center (VUmc) and with  
173 approval of the Animal Care Committee of the VUmc. For experiments, freshly isolated  
174 cardiomyocytes were cultured at 37°C overnight on polyacrylamide gels (25%  
175 Acrylamide40%, 13% Bis2%) with a stiffness of approximately 15kPa. Prior to culture,  
176 these gels were coated with laminin (10 $\mu$ g/ml), collagen (50 $\mu$ g/ml) with and without  
177 recombinant SPARC (1 $\mu$ g/ml, PeproTech 120-36) in 0.1M HEPES, overnight at 4°C. The  
178 cardiac myocytes were plated in plating medium (M199 medium, Gibco, 31150-022, with  
179 1% Peniciline-Streptavidine and 5% fetal bovine serum) onto the coated gels, and after 1  
180 hour incubation at 37°C, medium was replaced to culture medium (M199 medium with



181 1% Peniciline-Streptavidine, 0.2% Insulin Transferrin Sodium selenite and 0.1%  
182 Cytochalasin D). After overnight incubation at 37°C, unloaded cell shortenings of the  
183 adherent cardiac myocytes were measured in the culture medium, using different  
184 frequencies of electrical field stimulation and analyzed using IonOptix software (IonOptix  
185 LLC, Milton, MA). Data are presented as fractional shortening (% diastolic length), time to  
186 peak of contraction (TTP) and 50% relaxation time (RT50).

### 187 **Determining gel stiffness**

188 Stiffness of fully hydrated gels was determined using a Piuma Nano-indentor (Optics 11,  
189 Amsterdam, the Netherlands) in combination with an indentation probe with a stiffness  
190 of 1 N/m and a tip radius of 44  $\mu\text{m}$  (Optics 11, Amsterdam, the Netherlands). The gel's  
191 Young's modulus was determined by averaging 9 individual measurements.

### 192 **Histology and microscopy**

193 Cardiac tissue was processed and histochemical and immunohistochemical analyses were  
194 performed as previously described [22–24] , and all morphometric analyses were done  
195 on sections with myocyte in cross-sectional images. Hematoxylin and eosin – stained  
196 sections (4  $\mu\text{m}$ ) were used to assess overall morphology. The number of CD-45 – staining  
197 cells (monoclonal rat antibody, BD, 553076, clone 30-F11, 5 $\mu\text{g}/\text{ml}$ ) was measured per  
198  $\text{mm}^2$ . Myocyte cross-sectional areas were calculated by measuring the inner  
199 circumference of 150 myocytes per sample on laminin– stained sections (rabbit antibody,  
200 Sigma, L9393, 125 $\mu\text{g}/\text{ml}$ ). To assess the amount and cross-linking of fibrosis, Picro Sirius  
201 Red staining was performed as previously described [24,25]. Microscopic analyses were

202 performed using a microscope (Leitz DMRXE; Leica), and QWin morphometry software  
203 (Leica). All analyses were performed according to standard operating procedures.

## 204 **Immunostaining of isolated cardiac myocytes**

205 Adult cardiac myocytes were isolated from healthy mice as described, fixed in 2% PFA in  
206 PBS for 10 min, incubated in 50mM glycine for 30 min to remove auto-fluorescence  
207 caused by PFA at 488nm, and subsequently stained for SPARC (polyclonal goat antibody,  
208 R&D systems, AF492, 5µg/ml) overnight at 4°C. The next day cells were initially incubated  
209 with a secondary donkey-anti goat-alexa 488 labeled antibody for 90min. at room  
210 temperature and some cells were subsequently stained for integrin beta1 (monoclonal  
211 rat antibody, BD, 553715, 0.5µg/ml) for 4 hours at room temperature and afterwards  
212 incubated with a secondary goat-anti rat-alexa 568 labeled antibody for 90min. at room  
213 temperature. Cells were visualized with confocal microscopy on a Zeiss LSM700  
214 microscope (Leica) using the Zen software (Leica), or analyzed using a BD FACSAria III flow  
215 cytometer (Becton Dickinson (BD), San Jose, CA) and FlowJo software (Ashland, Oregon).

## 216 **Immunostaining of the coated matrices**

217 Matrices were produced and coated as described previously and stored at 4°C prior to  
218 staining. Matrices were washed with PBS and subsequently stained for SPARC (polyclonal  
219 goat antibody, R&D systems, AF491, 5µg/ml), laminin (polyclonal rabbit antibody, Sigma,  
220 L9393, 5µg/ml) and collagen (monoclonal rat antibody, Merck Millipore, MAB 1912,  
221 1/100) overnight at 4°C. The next day matrices were incubated with a secondary donkey-  
222 anti goat-alexa 660, goat-anti rabbit-alexa 568 and, goat-anti rat-alexa 488 labeled

223 antibodies for 90min. at room temperature and matrices were visualized with confocal  
224 microscopy on a Zeiss LSM700 microscope (Leica) using the Zen software (Leica).

## 225 **Myocyte fractionation**

226 Adult cardiac myocytes were isolated from healthy mice as described, incubated in lysis  
227 buffer, containing (mM): 5 TrisHCl, 5 NaCl, 2 EDTA, 1 CaCl<sub>2</sub>, 1MgCl<sub>2</sub>, 2 DTT and pH was  
228 adjusted to 7.4. Phosphatase inhibitors (2%, Sigma, P044 and P5726) and protease  
229 inhibitors (4%, Roche, 11697498001) were added to the buffer, and cells were incubated  
230 overnight at 4°C. The next day, the cell suspension was centrifuged for 1 hour at 4°C and  
231 supernatant was collected as cytoplasmic fraction, the pellet was dissolved in lysis buffer  
232 and collected as the membrane fraction.

233

## 234 **Immunoprecipitation**

235 For immunoprecipitation, left ventricular tissue or isolated cardiomyocytes were lysed in  
236 immunoprecipitating buffer containing (mM): 150 NaCl, 20 Tris, 5 EDTA, 1% Triton X-100  
237 and pH was adjusted to pH 7.5 using NaOH. Phosphatase inhibitors (2%, Sigma, P044 and  
238 P5726) and protease inhibitors (4%, Roche, 11697498001) were added to the buffer.  
239 Dynabeads M-280 (Sheep anti rabbit a-Ig, Life Technologies, 2018-06) were washed with  
240 lysis buffer and incubated with SPARC antibody (monoclonal rabbit antibody, Sino  
241 Biological Inc, 50494-R001, 3ug in 200uL buffer) or rabbit serum as negative control, for  
242 2 hours at 4°C. Next, beads were washed and incubated with lysates overnight at 4°C. The  
243 next day, the non-bound lysates were collected and resolved for SDS-PAGE, beads were

244 washed and beads-bound immune complexes were resolved for SDS-PAGE. Samples were  
245 subsequently immunoblotted for the detection of ILK (polyclonal rabbit antibody, CST,  
246 3862, 1/1000).

## 247 **Western Blotting**

248 Proteins were isolated from left ventricular tissue, or from isolated cardiomyocytes,  
249 separated by SDS-PAGE and subsequently immunoblotted for the detection of pAkt  
250 (monoclonal rabbit antibody, Cell signaling, 4060, 1/1000), and total Akt (polyclonal rabbit  
251 antibody, Cell signaling, 9272, 1/1000), SPARC (polyclonal goat antibody, R&D systems,  
252 AF492, 5µg/ml) and GAPDH (monoclonal mouse antibody, Fitzgerald, 10R-G109a, clone  
253 6C5, 0.1µg/ml) overnight at 4°C. Signals were visualized using Hyperfilm ECL (Amersham  
254 Biosciences) and quantified using Image J software.

## 255 **Statistics**

256 Data were expressed as the mean ± SEM. Histological and molecular analyses in sham-  
257 operated and VM groups were performed in independent groups. For echocardiographic  
258 measurements, analyses were performed in independent groups, except for the  
259 experiment where SPARC or vehicle was infused with an osmotic minipump for 72h,  
260 where repeated measures were performed. Normal distribution of all continuous  
261 variables was tested according to the method of Kolmogorov and Smirnov. An unpaired  
262 Student t-test for 2 groups or ANOVA, followed by a Bonferroni post hoc test for more  
263 groups was used in most of the comparisons when groups passed the normality test.

264 When the standard deviation of two groups significantly differed, a Mann-Whitney test  
265 for 2 groups or a Kruskal-Wallis test, followed by a Dunn's post hoc test for more groups,  
266 was used. A paired Student's t test was used to analyze baseline and follow-up  
267 echocardiographic measurements, a Wilcoxon test was used when data did not pass  
268 normality test. A two-sided p-value of  $\leq 0.05$  was considered statistically significant.

269

## 270 **Results**

271

### 272 **Extracellular SPARC increases cardiomyocyte contraction**

273 To study how extracellular SPARC can improve cardiac function, we investigated whether  
274 extracellular SPARC directly interacts with the cardiomyocytes. SPARC presence on the  
275 cardiomyocyte increased when cells were isolated and incubated with 1mg/ml SPARC ex  
276 vivo for 1h, as compared to cells incubated in normal buffer without SPARC ([Figure 1A](#)).  
277 These SPARC-incubated cells demonstrated a higher cardiomyocyte cell shortening  
278 ([Figure 1B and C](#)), with no significant changes in contraction times (TTP) or relaxation  
279 times (RT50) ([Supplementary Figure 1A and B](#)). To mimic more *in vivo* conditions, we  
280 coated matrices with physiological stiffness with laminin and collagen (Lam+Col) or  
281 laminin, collagen and SPARC (Lam+Col+SPARC) ([Figure 1G](#)). SPARC, a known collagen-  
282 binding protein, co-localized with collagen on the matrices ([Figure 1D](#)) and importantly,  
283 the presence of SPARC did not alter matrix stiffness ([Figure 1E](#)). Next, we isolated  
284 cardiomyocytes from adult rats and cultured them overnight on these matrices. When

285 stimulated at 0.5, 1 and 2 Hz, rat cardiomyocytes cultured on SPARC-containing matrices  
286 demonstrated an increased cardiomyocyte shortening at all frequencies when compared  
287 to cells cultured on matrices without SPARC (Figure 1F), while, once again, both TTP and  
288 RT50 were unchanged (Supplementary Figure 1C and D).

289

290 Using Western Blot, we demonstrate SPARC presence in the membrane fraction, yet  
291 absence in the cytosolic fraction of isolated cardiomyocytes (Figure 1G). Using  
292 immunostaining and confocal microscopy we confirmed SPARC's presence on the  
293 membrane of the cardiac myocyte, where it co-localizes with integrin-beta1 (Figure 1H).  
294 Furthermore, immuno-precipitation demonstrated an interaction of SPARC with integrin-  
295 linked kinase (ILK) in both whole LV samples and in isolated cardiomyocytes (Figure 1I).

296

297 To investigate whether this SPARC-induced increased cardiomyocyte cell shortening is  
298 through ILK-signaling, we incubated cells in the presence of SPARC and/or the ILK-  
299 inhibitor CPD-22. Importantly, the SPARC-induced increased cardiomyocyte cell  
300 shortening is blunted in the presence of the ILK-inhibitor (Figure 1J). These results indicate  
301 that SPARC increases cardiomyocyte cell shortening, at least in part, through ILK signaling.  
302 Notably, CPD-22 alone did not affect cardiomyocyte shortening (Figure 1J).

303

304 In conclusion, these results demonstrate a direct binding of SPARC with the  
305 cardiomyocyte membrane, where it appears to interact with ILK and is found in close  
306 proximity to integrin-beta1. Moreover, SPARC presence on the membrane increases

307 when cells are incubated in the presence of recombinant SPARC, resulting in increased  
308 cardiomyocyte contraction, mediated -at least in part- through increased ILK signaling.

309

310

## 311 **SPARC improves cardiomyocyte function in virus-induced heart**

### 312 **failure**

313 We subsequently investigated whether SPARC was able to improve cardiomyocyte  
314 fractional shortening in conditions where function of this cell type is impaired.

315 Considering the influence of SPARC on enhancing collagen cross-linking, we aimed to

316 study the influence of SPARC on cardiomyocyte function *in vivo* in a disease model with

317 limited fibrosis. As we recently observed changes in cardiac function and ventricular

318 conductivity during VM when SPARC was absent, we decided to investigate in further

319 details the effect of SPARC on cardiomyocyte function in this disease setting. Therefore,

320 a low-dose VM model where mice developed minimal fibrosis, allowed us to study the

321 effect of adenoviral mediated SPARC overexpression on cardiac function and

322 cardiomyocyte contraction. In this model 10<sup>3</sup> PFU CVB3 was injected intraperitoneally,

323 resulting in mild inflammation and fibrosis, and no cardiomyocyte hypertrophy ([Figure 2A](#)

324 - [D](#)). Yet, cardiac contraction as measured by FS was decreased ([Figure 2E](#)), and there was

325 an apparent onset of cardiac dilation suggested by an increased end systolic diameter

326 (ESD) ([Figure 2F](#)). Importantly, fractional shortening of isolated cardiomyocytes was also

327 compromised in this model ([Figure 2G](#)). Under field stimulation conditions, these

328 cardiomyocytes did not display a prolonged TTP, but RT50 values were significantly  
329 increased ([Supplementary Figure 2A and B](#)).

330

331 Next, using this low-dose VM model, we systemically injected SPARC with the adenoviral  
332 vector with the intention of increasing cardiac SPARC expression ([Figure 2H](#)). One week  
333 after CVB3 injection, Western Blotting revealed that cardiac SPARC levels were increased  
334 in 3 out of the 4 mice from the adenoviral-SPARC injected group when compared to the  
335 control adenoviral-GFP injected mice ([Supplementary Figure 2C](#)). Five weeks after CVB3  
336 injection, higher FS, and preserved ESD was measured in the SPARC overexpressing  
337 animals as compared to GFP overexpression ([Figure 2I,J](#)), demonstrating that SPARC  
338 overexpression prevents the development of cardiac dysfunction in this mild VM model.  
339 Importantly, myocyte cross-sectional area, the amount of fibrosis, collagen cross-linking,  
340 and the number of CD45 positive cells in the heart did not differ between the 2 groups, 5  
341 weeks after CVB3 injection ([Table 1](#)). Still, increased fractional shortening was  
342 demonstrated by isolated cardiomyocytes from SPARC-overexpressing animals as  
343 compared to isolated cardiomyocytes from control GFP overexpressing animals ([Figure](#)  
344 [2K](#)), indicating a protective, or positive inotropic effect of SPARC at the level of the  
345 cardiomyocyte. Notably, no effect on contraction or relaxation times was observed  
346 ([Supplementary Figure 2E and F](#)). Furthermore, despite SPARC being a Ca<sup>2+</sup>- binding  
347 protein, we could not find indications that SPARC influenced Ca<sup>2+</sup>-handling, as there were  
348 no differences in the Ca<sup>2+</sup> transient peak heights ([Figure 2L](#)), TTP or RT50 ([Supplementary](#)  
349 [Figure 3G and H](#)) of these isolated myocytes. Moreover, we did not find any differences



350 in Akt phosphorylation between LV samples from both groups, which is known to increase  
351 intracellular  $\text{Ca}^{2+}$ -availability and enhance contraction [26], in LV samples from both  
352 groups, as shown by Western Blotting (Figure 2M), further supporting no immediate role  
353 for SPARC in  $\text{Ca}^{2+}$ -handling. Taken together, these data demonstrate a protective effect  
354 of SPARC on cardiomyocyte function prior to the establishment of virus-induced heart  
355 failure. Furthermore, these data indicate that SPARC affects filament sensitivity to  $\text{Ca}^{2+}$   
356 rather than altering  $\text{Ca}^{2+}$  handling within the cell.

357

358 We next wanted to assess the therapeutic potential for SPARC, using a high-dose CVB3  
359 model with pronounced cardiac inflammation and fibrosis and severely compromised  
360 cardiac function (Figure 3A-F). In this model, a higher dose of CVB3 ( $10^4$  PFU CVB3) was  
361 injected intraperitoneally in mice, resulting in severe cardiac inflammation after 1 week,  
362 and prominent fibrosis and cardiomyocyte hypertrophy after 5 weeks (Figure 3A - D).  
363 Here, cardiac function was even more compromised, as shown by severely decreased FS  
364 (Figure 3E), and significantly increased ESD, indicating cardiac dilation in this model  
365 (Figure 3F). To investigate the therapeutic potential of SPARC, we infused mice with  
366 SPARC or vehicle for 72h implanting an osmotic minipump 5 weeks after initial viral  
367 exposure, when dilated cardiomyopathy with severe inflammation and fibrosis had been  
368 established and measured cardiac function prior and after 72h of SPARC or vehicle  
369 infusion (Figure 3G). We found an increased FS in the SPARC treated group, while FS in  
370 the vehicle group continued to decline (Figure 3H). End diastolic diameter (EDD) was  
371 slightly smaller in the SPARC group prior to treatment, compared to the vehicle group.

372 However, EDD did not change due to the SPARC treatment, while in the vehicle group  
373 EDD were slightly decreased after 72h. ESD, on the other hand, was not different between  
374 groups or time-points ([Figure 3I](#)). Moreover, myocyte cross-sectional area and the  
375 amount of CD45 positive cells in hearts did not differ between the 2 groups ([Table 2](#)). Yet,  
376 while the amount of fibrosis did not differ, collagen cross-linking was increased in the  
377 SPARC-treated group as compared to the vehicle group ([Table 2](#)), confirming the  
378 previously demonstrated effect of SPARC on collagen-crosslinking. Nevertheless, despite  
379 this higher collagen cross-linking, we found next to increased cardiac contraction, a trend  
380 to increasing shortening in isolated cardiomyocytes from these SPARC-treated mice at  
381 2Hz pacing cycle length when compared to cells isolated from vehicle-treated mice ([Figure](#)  
382 [3J](#)), with no differences in TTP or RT50 ([Supplementary Figure 2I and J](#)). In addition, when  
383 cardiomyocytes were isolated from these severely sick, untreated mice, incubation of the  
384 cells with SPARC for 1h *ex vivo* resulted in a significant increase in cardiomyocyte  
385 shortening, compared to control cells ([Figure 3K](#)), again without influencing TTP or RT50  
386 ([Supplementary Figure 2K and L](#)).

387

388 Finally, when we infused healthy adult mice with SPARC or vehicle for 72h, we also found  
389 increased FS compared to baseline measurements and compared to vehicle-mice ([Figure](#)  
390 [3L](#)). SPARC administration caused decreased end-systolic diameters (ESD), but not end-  
391 diastolic diameters (EDD), while diameters did not change in hearts of vehicle-mice  
392 ([Figure 3M](#)) Again, SPARC administration did not affect cardiomyocyte hypertrophy, the  
393 amount of fibrosis, collagen cross-linking, or the amount of CD45 cells ([Table 3](#))

## 394 Discussion

395 To our knowledge this study is the first to demonstrate a direct role for a non-structural  
396 matrix protein on cardiomyocyte contraction, via interactions of this protein with  
397 intracellular effectors. Our previous study on SPARC in myocardial infarction suggested a  
398 previously unexplored potential inotropic function for SPARC in the heart. Here, we  
399 demonstrated increased cardiac contraction when SPARC was overexpressed, not only in  
400 infarcted mice, but also in sham-operated mice [5] yet how SPARC might directly affected  
401 cardiomyocyte contraction remained undetermined. Therefore, in this study we aimed to  
402 explore the role of SPARC on cardiomyocyte contractility using various *ex vivo* and *in vivo*  
403 models. We have shown that extracellular SPARC increases cardiomyocyte contraction,  
404 during both health and disease, possibly by interacting with the integrin-beta1-ILK  
405 complex on the cardiomyocyte membrane. Not only is SPARC able to prevent a decrease  
406 in cardiac function, but it is also able to rescue myocytes that are already compromised  
407 through viral infection. These data highlight the potential of SPARC as a therapy in VM  
408 and potentially in other disease states where cardiac function is equally compromised.

409

410 Earlier research by Barker and colleagues has demonstrated the interaction of SPARC with  
411 integrin-beta1 resulting in increased contractile signalling in lung fibroblasts through  
412 activation of ILK. Using SPARC null and WT cells they showed that SPARC is required for  
413 fibronectin-induced ILK-activation, which resulted in increased contractile signalling  
414 through MLC phosphorylation in these pulmonary fibroblasts [18]. In cardiomyocytes,  
415 MLC2v has been identified to be a critical regulator of cardiomyocyte contraction, by

416 promoting actin-myosin interaction [27]. Our current working hypothesis is that SPARC  
417 increases cardiomyocyte contraction through its interaction with the integrin-beta1-ILK  
418 complex at the cardiomyocyte membrane. As a consequence, MLC phosphatase activity  
419 decreases intracellularly and hence ultimately increases the phosphorylation of MLC2v,  
420 causing increased actin-myosin interaction and thus augmented cardiomyocyte  
421 contraction (Figure 4). In line with Barker *et al.* [18] we have demonstrated an inotropic  
422 function of SPARC but this time in cardiomyocytes. SPARC increases cardiomyocyte  
423 fractional shortening possibly through its interaction with integrin-beta1 and increased  
424 downstream ILK signalling. Further studies will be required, however, to fully elucidate  
425 this mechanism.

426

427 Interestingly, in a study using monoclonal antibodies and peptides, the copper-binding  
428 domain of SPARC was identified to be required for the interaction of SPARC with integrin-  
429 beta1, resulting in increased ILK signalling. In the latter study, stressed lens epithelial cells  
430 displayed improved survival *in vitro* due to this interaction [28]. Mooney and colleagues  
431 also demonstrated improved survival through integrin-beta1 signalling in mesangial  
432 cells, however SPARC failed to promote survival in this model.[29]

433

434 In the present study we did not investigate a potential protective effect of SPARC on  
435 myocyte survival, however we could not find evidence for decreased stress in VM hearts  
436 of SPARC overexpressing or SPARC treated mice, as was shown by equal amounts of  
437 fibrosis and CD45 positive cells, and the absence of cardiomyocyte hypertrophy in both

438 subsets of hearts. Furthermore, SPARC overexpression did not result in altered levels of  
439 phosphorylated Akt, which is known to regulate cardiomyocyte hypertrophy and  
440 apoptosis [30,31]. On the other hand, we did see a slight reduction in leukocyte  
441 infiltration in SPARC overexpressing hearts, 1 week after CVB3 infection. So if SPARC  
442 would provide any protective effect during VM, it is most likely through affecting  
443 leukocyte infiltration into the heart, and not by directly promoting cardiomyocyte  
444 survival.

445

446 Furthermore, we also demonstrate a rapid effect of SPARC on collagen cross-linking *in*  
447 *vivo* as collagen cross-linking is augmented in VM hearts with severe fibrosis, but not in  
448 VM hearts with little fibrosis or in healthy hearts, after 3 days of SPARC administration.  
449 Importantly, FS in the heart and of the isolated cardiomyocytes was higher in all animals  
450 which were administered SPARC.

451

## 452 **Conclusions**

453 In conclusion, this study is the first to demonstrate a novel inotropic function for SPARC  
454 in the healthy heart, possibly by interacting with the integrin-beta1 on the cardiomyocyte  
455 membrane and resulting in altered downstream contractile signaling. Moreover, we have  
456 demonstrated the benefit of SPARC on contractile forces after coxsackie virus induced  
457 cardiac injury, which emphasizes the potential therapeutic application of this agent under  
458 these conditions, and perhaps provides proof of concept that this protein could also be  
459 of therapeutic benefit in other cardiac diseases where contractile function is diminished.

## 460 **Funding**

461 This work was supported by a CARIM-funded PhD grant, and by the European  
462 Commission's grants FIBROTARGETS [602904], MEDIA [261409], and ARENA [CVON  
463 2011]. DMJ was funded by a postdoctoral fellowship from the FWO.

## 464 **References**

- 465 1. Chen H, Huang XN, Stewart AFR, Sepulveda JL. Gene expression changes associated  
466 with fibronectin-induced cardiac myocyte hypertrophy. *Physiol Genomics*. 2004;18:  
467 273–283. doi:10.1152/physiolgenomics.00104.2004
- 468 2. Harris BS, Zhang Y, Card L, Rivera LB, Brekken RA, Bradshaw AD. SPARC regulates  
469 collagen interaction with cardiac fibroblast cell surfaces. *Am J Physiol Heart Circ*  
470 *Physiol*. 2011;301: H841-847. doi:10.1152/ajpheart.01247.2010
- 471 3. Bradshaw AD, Sage EH. SPARC, a matricellular protein that functions in cellular  
472 differentiation and tissue response to injury. *J Clin Invest*. 2001;107: 1049–1054.  
473 doi:10.1172/JCI12939
- 474 4. Murphy-Ullrich JE, Sage EH. Revisiting the matricellular concept. *Matrix Biol*.  
475 2014;37: 1–14. doi:10.1016/j.matbio.2014.07.005
- 476 5. Schellings MWM, Vanhoutte D, Swinnen M, Cleutjens JP, Debets J, van Leeuwen  
477 REW, et al. Absence of SPARC results in increased cardiac rupture and dysfunction  
478 after acute myocardial infarction. *J Exp Med*. 2009;206: 113–123.  
479 doi:10.1084/jem.20081244
- 480 6. Mason JW. Myocarditis and dilated cardiomyopathy: an inflammatory link.  
481 *Cardiovasc Res*. 2003;60: 5–10.

- 482 7. Corsten MF, Schroen B, Heymans S. Inflammation in viral myocarditis: friend or  
483 foe? *Trends Mol Med*. 2012;18: 426–437. doi:10.1016/j.molmed.2012.05.005
- 484 8. Hazebroek M, Dennert R, Heymans S. Virus infection of the heart--unmet  
485 therapeutic needs. *Antivir Chem Chemother*. 2012;22: 249–253.  
486 doi:10.3851/IMP2047
- 487 9. Pollack A, Kontorovich AR, Fuster V, Dec GW. Viral myocarditis--diagnosis,  
488 treatment options, and current controversies. *Nat Rev Cardiol*. 2015;12: 670–680.  
489 doi:10.1038/nrcardio.2015.108
- 490 10. Kaese S, Larbig R, Rohrbeck M, Frommeyer G, Dechering D, Olligs J, et al.  
491 Electrophysiological alterations in a murine model of chronic coxsackievirus B3  
492 myocarditis. *PLoS ONE*. 2017;12: e0180029. doi:10.1371/journal.pone.0180029
- 493 11. Steinke K, Sachse F, Ettischer N, Strutz-Seebohm N, Henrion U, Rohrbeck M, et al.  
494 Coxsackievirus B3 modulates cardiac ion channels. *FASEB J*. 2013;27: 4108–4121.  
495 doi:10.1096/fj.13-230193
- 496 12. Wessely R, Klingel K, Santana LF, Dalton N, Hongo M, Jonathan Lederer W, et al.  
497 Transgenic expression of replication-restricted enteroviral genomes in heart  
498 muscle induces defective excitation-contraction coupling and dilated  
499 cardiomyopathy. *J Clin Invest*. 1998;102: 1444–1453. doi:10.1172/JCI1972
- 500 13. Deckx S, Heggermont W, Carai P, Rienks M, Dresselaers T, Himmelreich U, et al.  
501 Osteoglycin prevents the development of age-related diastolic dysfunction during



- 502 pressure overload by reducing cardiac fibrosis and inflammation. *Matrix Biol.*  
503 2018;66: 110–124. doi:10.1016/j.matbio.2017.09.002
- 504 14. Papageorgiou A-P, Swinnen M, Vanhoutte D, VandenDriessche T, Chuah M, Lindner  
505 D, et al. Thrombospondin-2 prevents cardiac injury and dysfunction in viral  
506 myocarditis through the activation of regulatory T-cells. *Cardiovasc Res.* 2012;94:  
507 115–124. doi:10.1093/cvr/cvs077
- 508 15. Rienks M, Carai P, van Teeffelen J, Eskens B, Verhesen W, Hemmerlyckx B, et al.  
509 SPARC preserves endothelial glycocalyx integrity, and protects against adverse  
510 cardiac inflammation and injury during viral myocarditis. *Matrix Biol.* 2018;74: 21–  
511 34. doi:10.1016/j.matbio.2018.04.015
- 512 16. Swinnen M, Vanhoutte D, Van Almen GC, Hamdani N, Schellings MWM, D’hooge J,  
513 et al. Absence of thrombospondin-2 causes age-related dilated cardiomyopathy.  
514 *Circulation.* 2009;120: 1585–1597. doi:10.1161/CIRCULATIONAHA.109.863266
- 515 17. Van Aelst LNL, Voss S, Carai P, Van Leeuwen R, Vanhoutte D, Sanders-van Wijk S, et  
516 al. Osteoglycin prevents cardiac dilatation and dysfunction after myocardial  
517 infarction through infarct collagen strengthening. *Circ Res.* 2015;116: 425–436.  
518 doi:10.1161/CIRCRESAHA.116.304599
- 519 18. Barker TH, Baneyx G, Cardó-Vila M, Workman GA, Weaver M, Menon PM, et al.  
520 SPARC regulates extracellular matrix organization through its modulation of

- 521 integrin-linked kinase activity. *J Biol Chem.* 2005;280: 36483–36493.  
522 doi:10.1074/jbc.M504663200
- 523 19. He TC, Zhou S, da Costa LT, Yu J, Kinzler KW, Vogelstein B. A simplified system for  
524 generating recombinant adenoviruses. *Proc Natl Acad Sci USA.* 1998;95: 2509–  
525 2514.
- 526 20. Heymans S, Corsten MF, Verhesen W, Carai P, van Leeuwen REW, Custers K, et al.  
527 Macrophage microRNA-155 promotes cardiac hypertrophy and failure. *Circulation.*  
528 2013;128: 1420–1432. doi:10.1161/CIRCULATIONAHA.112.001357
- 529 21. Kaestner L, Scholz A, Hammer K, Vecerdea A, Ruppenthal S, Lipp P. Isolation and  
530 genetic manipulation of adult cardiac myocytes for confocal imaging. *J Vis Exp.*  
531 2009; doi:10.3791/1433
- 532 22. Heymans S, Luttun A, Nuyens D, Theilmeier G, Creemers E, Moons L, et al.  
533 Inhibition of plasminogen activators or matrix metalloproteinases prevents cardiac  
534 rupture but impairs therapeutic angiogenesis and causes cardiac failure. *Nat Med.*  
535 1999;5: 1135–1142. doi:10.1038/13459
- 536 23. Lutgens E, Daemen MJ, de Muinck ED, Debets J, Leenders P, Smits JF. Chronic  
537 myocardial infarction in the mouse: cardiac structural and functional changes.  
538 *Cardiovasc Res.* 1999;41: 586–593.
- 539 24. Vanhoutte D, Schellings MWM, Götte M, Swinnen M, Herias V, Wild MK, et al.  
540 Increased expression of syndecan-1 protects against cardiac dilatation and

- 541 dysfunction after myocardial infarction. *Circulation*. 2007;115: 475–482.  
542 doi:10.1161/CIRCULATIONAHA.106.644609
- 543 25. Junqueira LC, Bignolas G, Brentani RR. Picrosirius staining plus polarization  
544 microscopy, a specific method for collagen detection in tissue sections. *Histochem*  
545 *J*. 1979;11: 447–455.
- 546 26. Cittadini A, Monti MG, Iaccarino G, Di Rella F, Tsihlis PN, Di Gianni A, et al.  
547 Adenoviral gene transfer of Akt enhances myocardial contractility and intracellular  
548 calcium handling. *Gene Ther*. 2006;13: 8–19. doi:10.1038/sj.gt.3302589
- 549 27. Sheikh F, Lyon RC, Chen J. Getting the skinny on thick filament regulation in cardiac  
550 muscle biology and disease. *Trends Cardiovasc Med*. 2014;24: 133–141.  
551 doi:10.1016/j.tcm.2013.07.004
- 552 28. Weaver MS, Workman G, Sage EH. The copper binding domain of SPARC mediates  
553 cell survival in vitro via interaction with integrin beta1 and activation of integrin-  
554 linked kinase. *J Biol Chem*. 2008;283: 22826–22837. doi:10.1074/jbc.M706563200
- 555 29. Mooney A, Jackson K, Bacon R, Streuli C, Edwards G, Bassuk J, et al. Type IV  
556 collagen and laminin regulate glomerular mesangial cell susceptibility to apoptosis  
557 via beta(1) integrin-mediated survival signals. *Am J Pathol*. 1999;155: 599–606.
- 558 30. Chaanine AH, Hajjar RJ. AKT signalling in the failing heart. *Eur J Heart Fail*. 2011;13:  
559 825–829. doi:10.1093/eurjhf/hfr080

- 560 31. Terada Y, Inoshita S, Hanada S, Shimamura H, Kuwahara M, Ogawa W, et al.  
561 Hyperosmolality activates Akt and regulates apoptosis in renal tubular cells. *Kidney*  
562 *Int.* 2001;60: 553–567. doi:10.1046/j.1523-1755.2001.060002553.x

563

## 564 **Figure Legends**

565

566 **Figure 1. SPARC improves cardiomyocyte contraction through its interaction with**  
567 **integrin-beta1**

568 A FACS analysis demonstrates increased SPARC staining when cardiomyocytes were  
569 isolated and incubated with SPARC *ex vivo* for 1h, as compared to cells incubated in  
570 normal buffer without SPARC.

571 B,C Isolated adult mouse cardiomyocytes displayed higher FS after 1h incubation with  
572 SPARC, compared to cells incubated in normal tyrode buffer.

573 D,E Matrices with physiological stiffness were coated with laminin and collagen (Lam  
574 + Col) or laminin, collagen and SPARC (Lam + Col + SPARC). SPARC co-localized with  
575 collagen on these matrices, but did not affect matrix stiffness.

576 F Adult rat cardiomyocytes were isolated and cultured on these matrices. Cells  
577 cultured on SPARC containing matrices displayed higher fractional shortening (FS),  
578 compared to cells cultured on matrices coated with L+C alone.

579 G SPARC is present in the membrane fraction, and absent in the cytosolic fraction of  
580 isolated cardiomyocytes, as demonstrated by Western Blotting.

581 H Using immunostaining and confocal microscopy we confirmed SPARC presence on  
582 the cardiomyocyte membrane, where it colocalizes with integrin-beta1.

583 I SPARC immunoprecipitation (I.P.) demonstrates interaction with integrin-linked  
584 kinase (ILK) in LV samples and in isolated cardiomyocytes.

585 J Isolated adult mouse cardiomyocytes were incubated in the presence of SPARC  
586 and/or the ILK-inhibitor CPD-22. The increased FS observed in cells incubated with SPARC  
587 was abolished in the presence of CPD-22.

588 A-C N=4 mice and n >4 cells per mouse, D-F N= 3 rats and >20 cells per rat, J N = 3 rats  
589 and >4cells per rat, bars panel D 100um, bars panel H 10um, \*p<0.05, \*\*p<0.01

590

591 **Figure 2. SPARC improves cardiomyocyte function in a mild model of virus-induced**  
592 **heart failure**

593 A - D A mild VM mouse models is used, where mice are injected with  $10^3$  PFU CVB3  
594 intraperitoneally. This results in moderate cardiac inflammation after 1 week), little  
595 fibrosis and no cardiomyocyte hypertrophy after 5 weeks.

596 E,F Viral infection caused decreased FS and increased ESD.

597 G Contraction of isolated cardiomyocytes is also compromised after virus-infection.

598 H SPARC is overexpressed with the use of an adenovirus, 2 weeks before mild CVB3  
599 inoculation.

600 I,J 5 weeks after CVB3 injection, higher FS were measured in the SPARC  
601 overexpressing group, with no differences in EDD, and slightly smaller ESD.

602 K Isolated myocytes from the SPARC-overexpressing hearts remained their  
603 increased shortening capacities as compared to isolated myocytes from control GFP-  
604 hearts.

605 L,M There were no differences in the  $Ca^{2+}$  transient peak heights, or levels of Akt  
606 phosphorylation.

607 A-F n= 11 for sham and n=13 for VM, G n= 11 for sham and n=13 for VM and >3 cells per  
608 mouse, H-J n=12 for advGFP group and n= 11 for advSPARC group, K,L n=12 for advGFP  
609 group and n= 11 for advSPARC group and >3cells per mouse, M n=3 for both groups, bar  
610 1000um for H&E and Sirius Red stainings, 100um for CD45 and laminin stainings, \*p<0.05,  
611 \*\*p<0.01, \*\*\*p<0.001, \*\*\*\*p<0.0001

612

613 **Figure 3. SPARC has therapeutic potential in severely virus-induced heart failure**

614 A - D In the more severe VM model mice are injected with  $10^4$  PFU CVB3, which results  
615 in severe cardiac inflammation after 1 week, and prominent fibrosis, but no  
616 cardiomyocyte hypertrophy after 5 weeks.

617 E, F Viral infection caused severely decreased FS and dilation of the heart.

618 G Mice were infused with SPARC or vehicle for 72h, 5 weeks after high-dose CVB3  
619 inoculation, when dilated cardiomyopathy with severe inflammation and fibrosis had  
620 been established.

621 H FS was increased in the SPARC treated group, while FS in the vehicle group  
622 continued to decline.

623 I EDD were slightly smaller in the SPARC group prior to treatment, compared to the  
624 vehicle group, but did not change due to the SPARC treatment, while in the vehicle group  
625 EDD were slightly decreased after 72h. ESD were not different between groups or  
626 between time-points.

627 J FS was increased in isolated cardiomyocytes from SPARC-treated mice when  
628 compared to cells isolated from vehicle-treated mice.

629 K When cardiomyocytes were isolated from the severely sick, untreated mice,  
630 incubation of the cells with SPARC for 1h *ex vivo* also resulted in increased FS, compared  
631 to control cells.

632 L,M Also healthy mice demonstrated higher FS when SPARC was administered for 72  
633 hours, compared to vehicle-administered mice. This resulted in decreased ESD but not  
634 decreased end-diastolic diameters EDD in SPARC-administered mice, while diameters did  
635 not change in vehicle-administered mice.

636 A-F n=11 for sham and n=13 for VM, G-I n=6 for VM+vehicle and n=7 for VM+SPARC, J n=6  
637 for VM+vehicle and n=7 for VM+SPARC and >3cells per mouse, K n=13 for both groups  
638 and >3cells per mouse, L,M n=11 for sham+vehicle and n=8 for sham+SPARC, bar 1000um  
639 for H&E and Sirius Red stainings, 100um for CD45 and laminin stainings, \*p<0.05,  
640 \*\*p<0.01, \*\*\*p<0.001, \*\*\*\*p<0.0001

641

642 **Figure 4. Proposed mechanism on how SPARC improves cardiomyocyte contraction.**

643 Our working hypothesis is that SPARC interacts with integrin-beta 1 and ILK on the  
644 cardiomyocyte membrane. This results in increased ILK signaling, blocking myosin light  
645 chain phosphatase (MLCP), and in this way increasing MLC phosphorylation and thus  
646 contraction.

647



648

649 **Table 1. Histological analysis of VM mice with GFP or SPARC adenoviral**  
650 **overexpression**

|                                                                  | 5 weeks VM       |                   |
|------------------------------------------------------------------|------------------|-------------------|
|                                                                  | AdvGFP<br>(n=10) | AdvSPARC<br>(n=8) |
| <b>Myocyte cross-sectional area (<math>\mu\text{m}^2</math>)</b> | 217 $\pm$ 6      | 224 $\pm$ 7       |
| <b>Fibrosis (%)</b>                                              | 2.4 $\pm$ 0.2    | 2.6 $\pm$ 0.4     |
| <b>Orange-red/ yellow-green fibers</b>                           | 1.15 $\pm$ 0.17  | 1.61 $\pm$ 0.14   |
| <b>CD45+ cells / mm<sup>2</sup></b>                              | 6.67 $\pm$ 2.73  | 6.57 $\pm$ 3.0    |

651

652

653 **Table 2. Histological analysis of VM mice with 72h vehicle or SPARC**  
654 **infusion**

|                                                                  | 5 weeks VM +<br>72h vehicle<br>(n ≥ 5) | 5 weeks VM +<br>72h SPARC<br>(n ≥ 6) |
|------------------------------------------------------------------|----------------------------------------|--------------------------------------|
| <b>Myocyte cross-sectional area (<math>\mu\text{m}^2</math>)</b> | 260 ± 10                               | 253 ± 13                             |
| <b>Fibrosis (%)</b>                                              | 15.2 ± 2.1                             | 20.3 ± 2.6                           |
| <b>Orange-red/ yellow-green fibers</b>                           | 1.28 ± 0.09                            | 2.14 ± 0.21**                        |
| <b>CD45+ cells / mm<sup>2</sup></b>                              | 57.5 ± 8.3                             | 84.1 ± 3.8                           |

655 \*\*p<0.01 vs. vehicle

656

657 **Table 3. Histological analysis of hearts after 72h vehicle or SPARC**  
658 **administration**

|                                        | <b>Vehicle</b> | <b>SPARC</b>   |
|----------------------------------------|----------------|----------------|
|                                        | <b>(n ≥ 6)</b> | <b>(n ≥ 4)</b> |
| <b>Myocyte cross-sectional area</b>    |                |                |
| (μm <sup>2</sup> )                     | 237 ± 12       | 252 ± 29       |
| <b>Fibrosis (%)</b>                    | 3.1 ± 0.4      | 2.9 ± 0.4      |
| <b>Orange-red/ yellow-green fibers</b> | 0.54 ± 0.07    | 0.55 ± 0.05    |
| <b>CD45+ cells / mm<sup>2</sup></b>    | 13.81 ± 5.65   | 10.34 ± 9.94   |

659

## 660 **Supporting Information**

661

### 662 **Supplementary Figure 1.**

663 A,B Incubation of isolated adult mouse cardiomyocytes with recombinant SPARC for  
664 1h *ex vivo* does not affect contraction – and relaxation times (TTP and RT50).

665 C,D TTP and RT50 are not altered in rat cardiomyocytes grown on a matrix with SPARC.

666 A,B N=4 mice and >4 cells per mouse, C,D N = 3 rats and >20 cells per rat

667

### 668 **Supplementary Figure 2.**

669 A, B Viral infection does not influence TTP but increases RT50 in isolated  
670 cardiomyocytes from virus-infected mice.

671 C cardiac SPARC is almost significantly overexpressed in the adenoviral-SPARC  
672 injected group when compared to the control adenoviral-GFP injected mice, as shown by  
673 Western Blotting.

674 D Slightly decreased cardiac inflammation, as measured by the amount of CD45  
675 positive cells, was seen in the SPARC overexpressing group.

676 E,F No effect on contraction or relaxation times was observed when SPARC was  
677 overexpressed.

678 G,H There were no differences in the Ca<sup>2+</sup> transient peak TTP or RT50 in cells from the  
679 SPARC overexpressing VM mice.

680 I, J Cardiomyocytes from SPARC-treated mice demonstrated no differences in TTP or  
681 RT50.

682 K,L When cardiomyocytes were isolated from severely sick, untreated mice,  
683 incubation of the cells with SPARC for 1h *ex vivo* did not influence TTP or RT50.

684 A,B n= 11 for sham and n=13 for VM and >3 cells per mouse , C n=4 for both groups, D  
685 n=5 for both groups, E-H n=12 for advGFP group and n= 11 for advSPARC group and  
686 >3cells per mouse, I,J n=6 for VM+vehicle and n=7 for VM+SPARC, K,L n=13 for both  
687 groups and >3cells per mouse

688

**Figure 1**

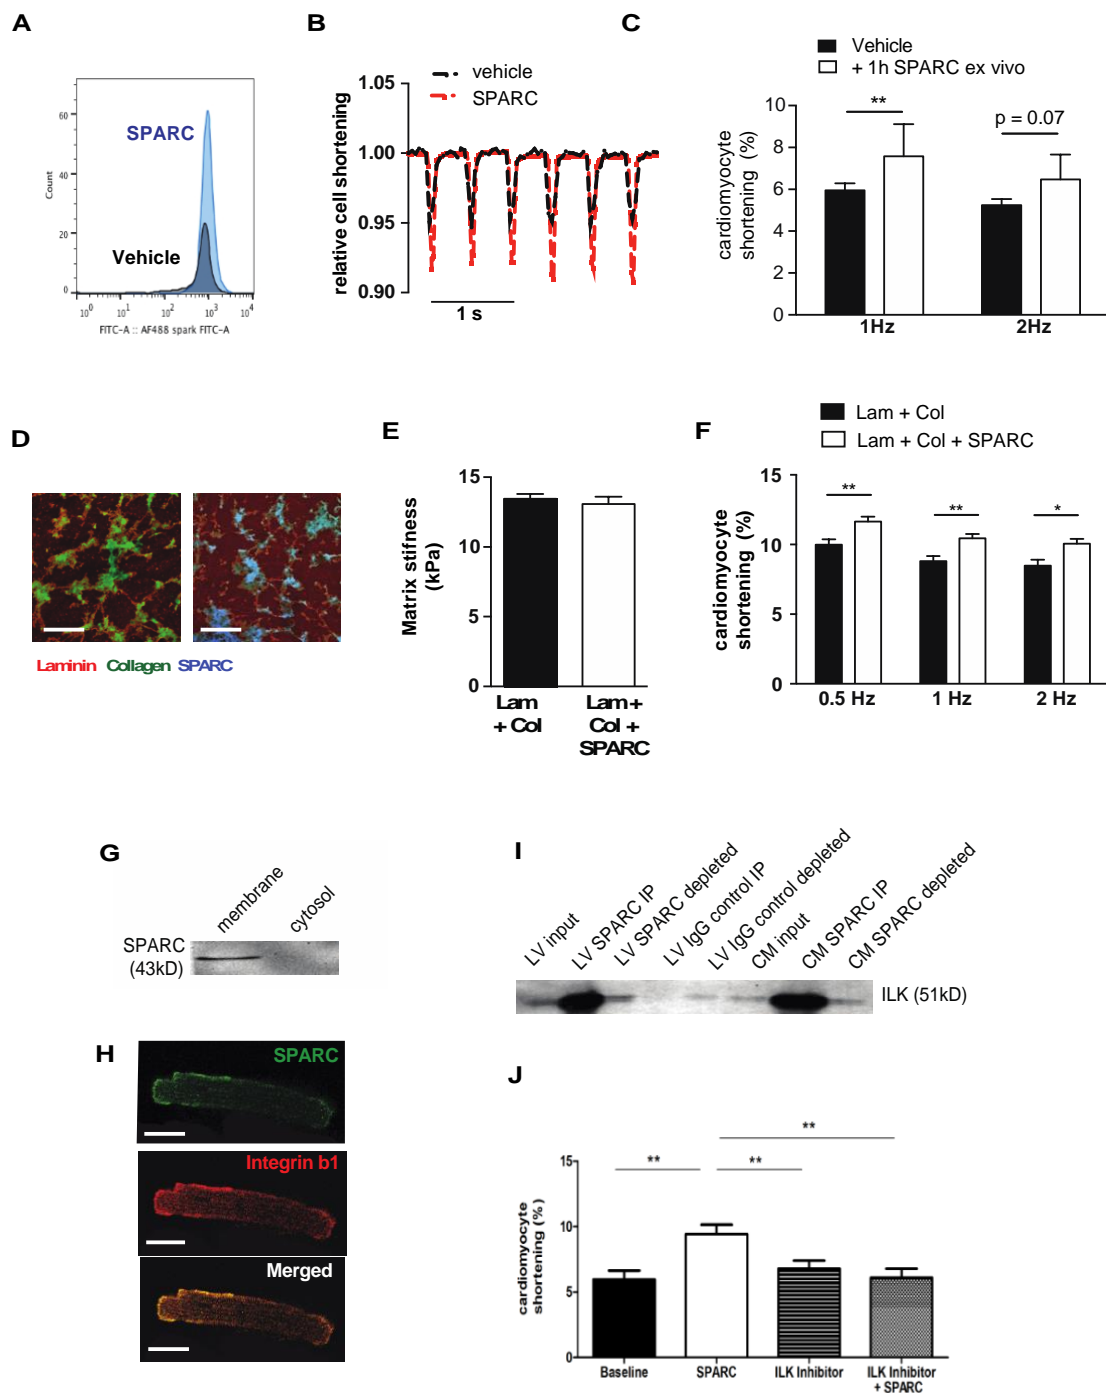

**Figure 2**

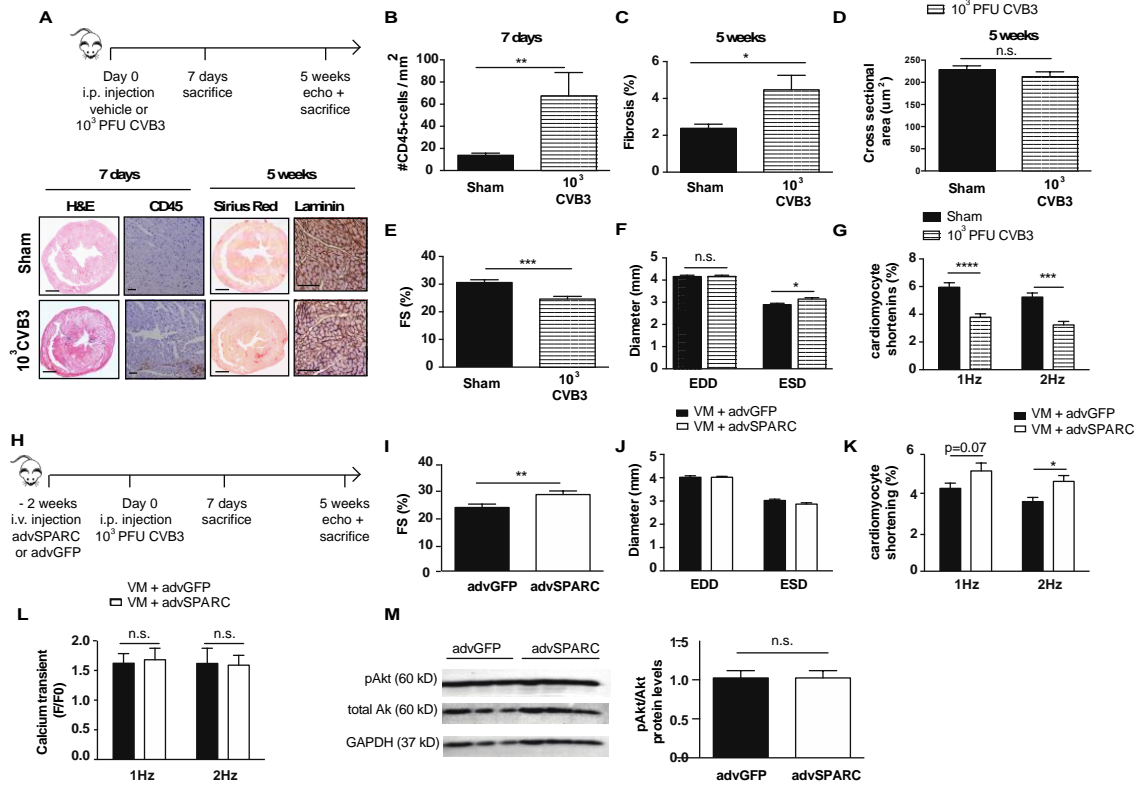

690

691

692

Figure 3

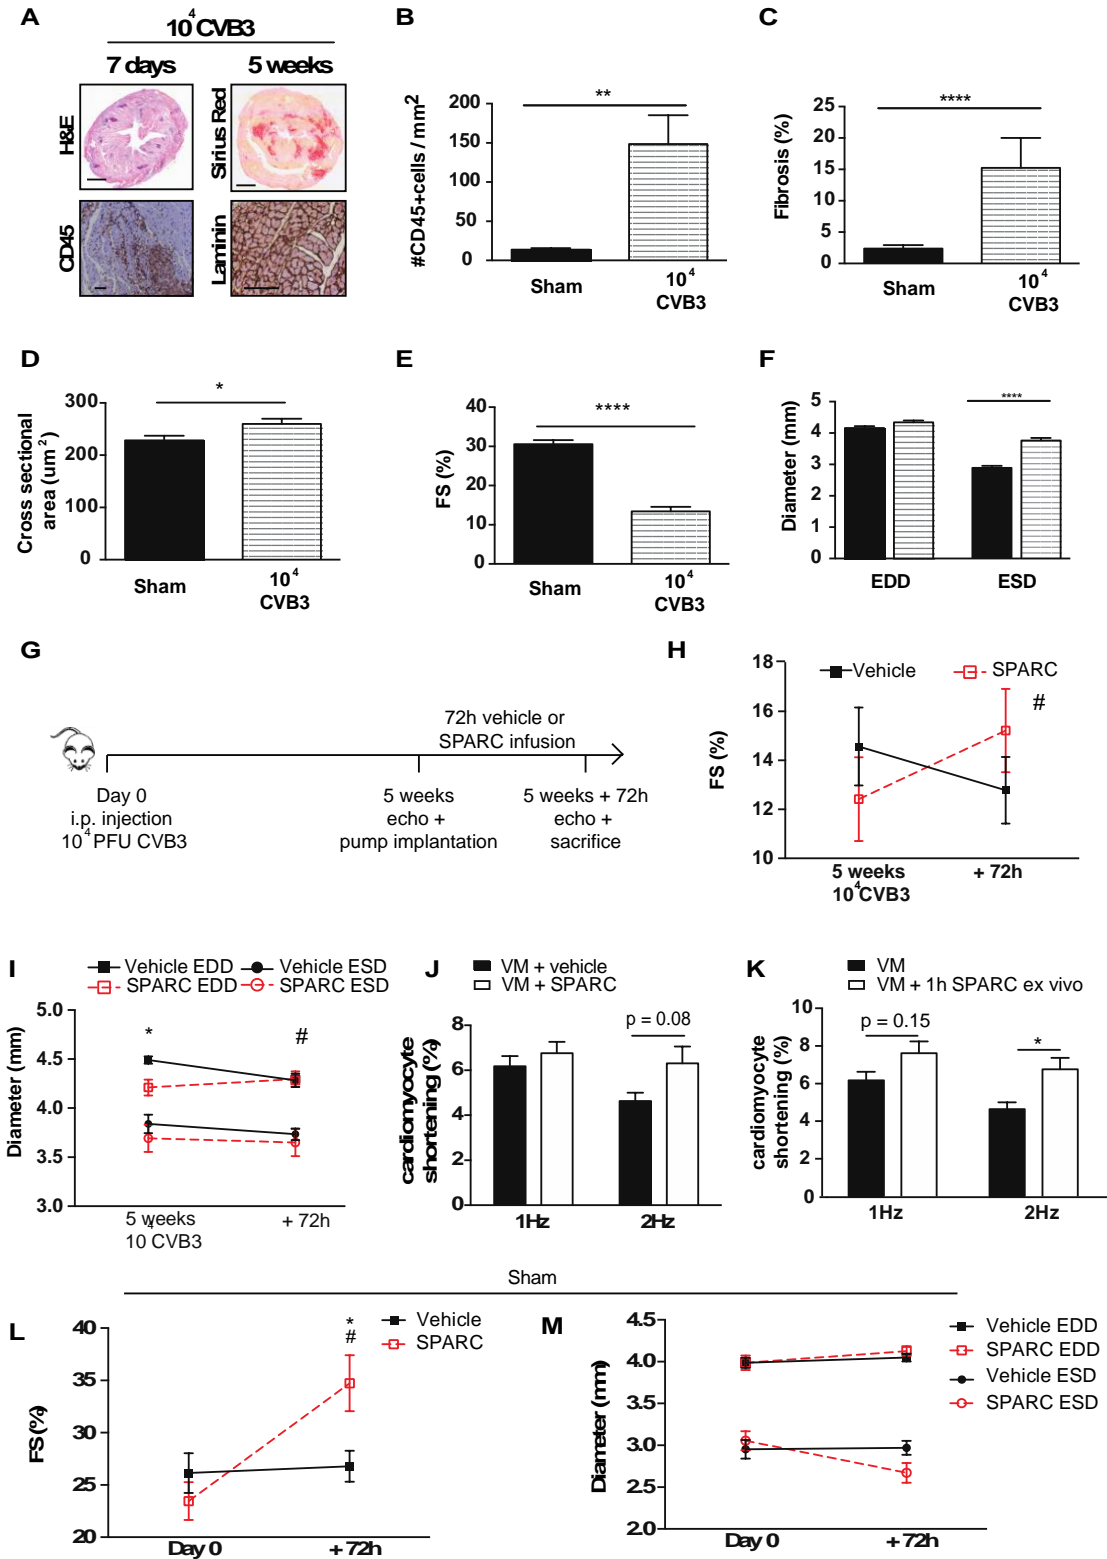

693

694



Figure 4

Extracellular Matrix

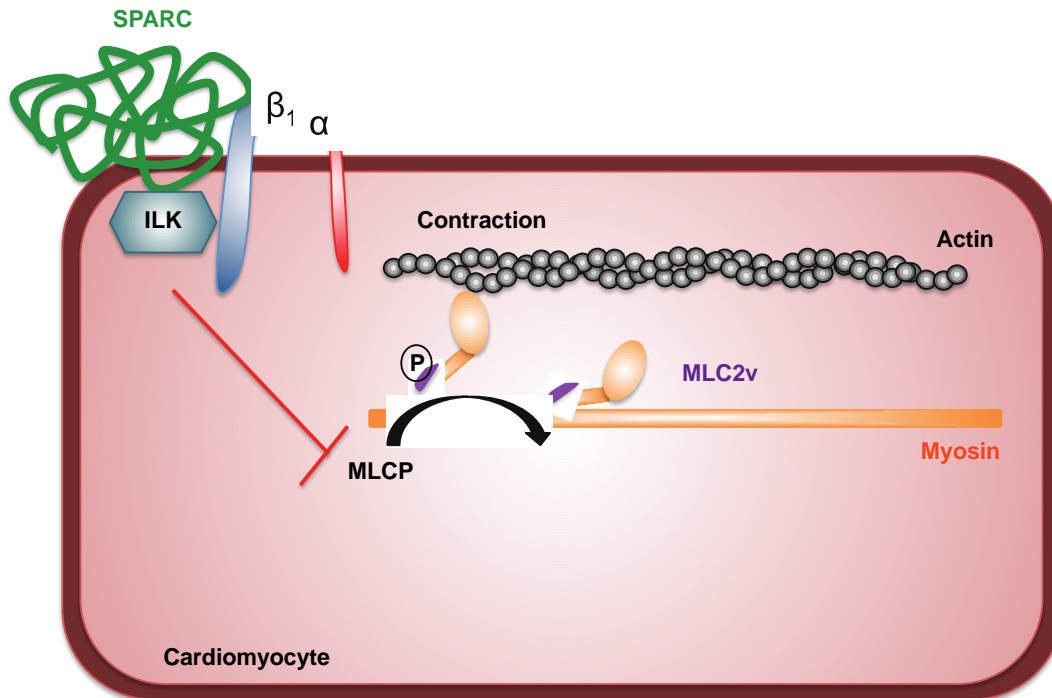

### Supplementary Figure 1

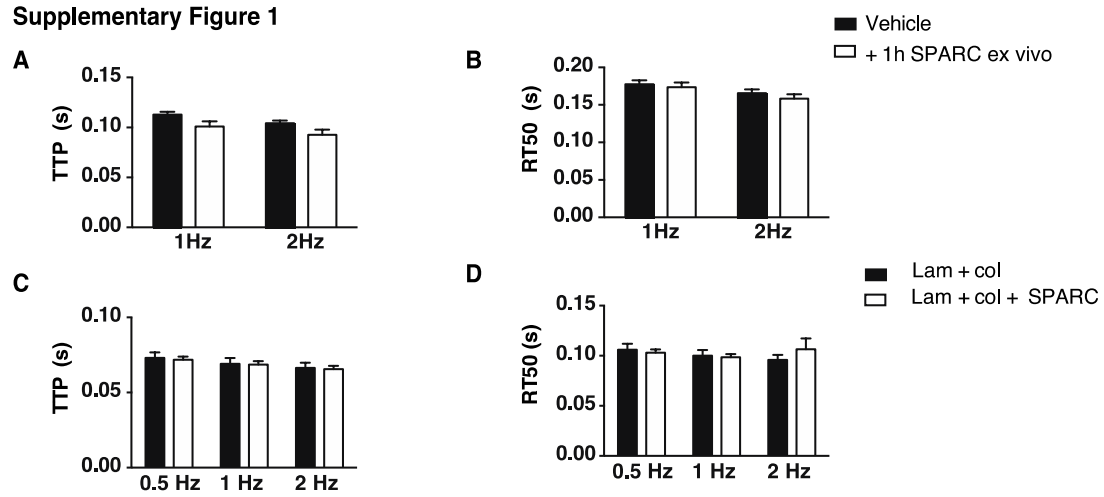

696

**Supplementary Figure 2**

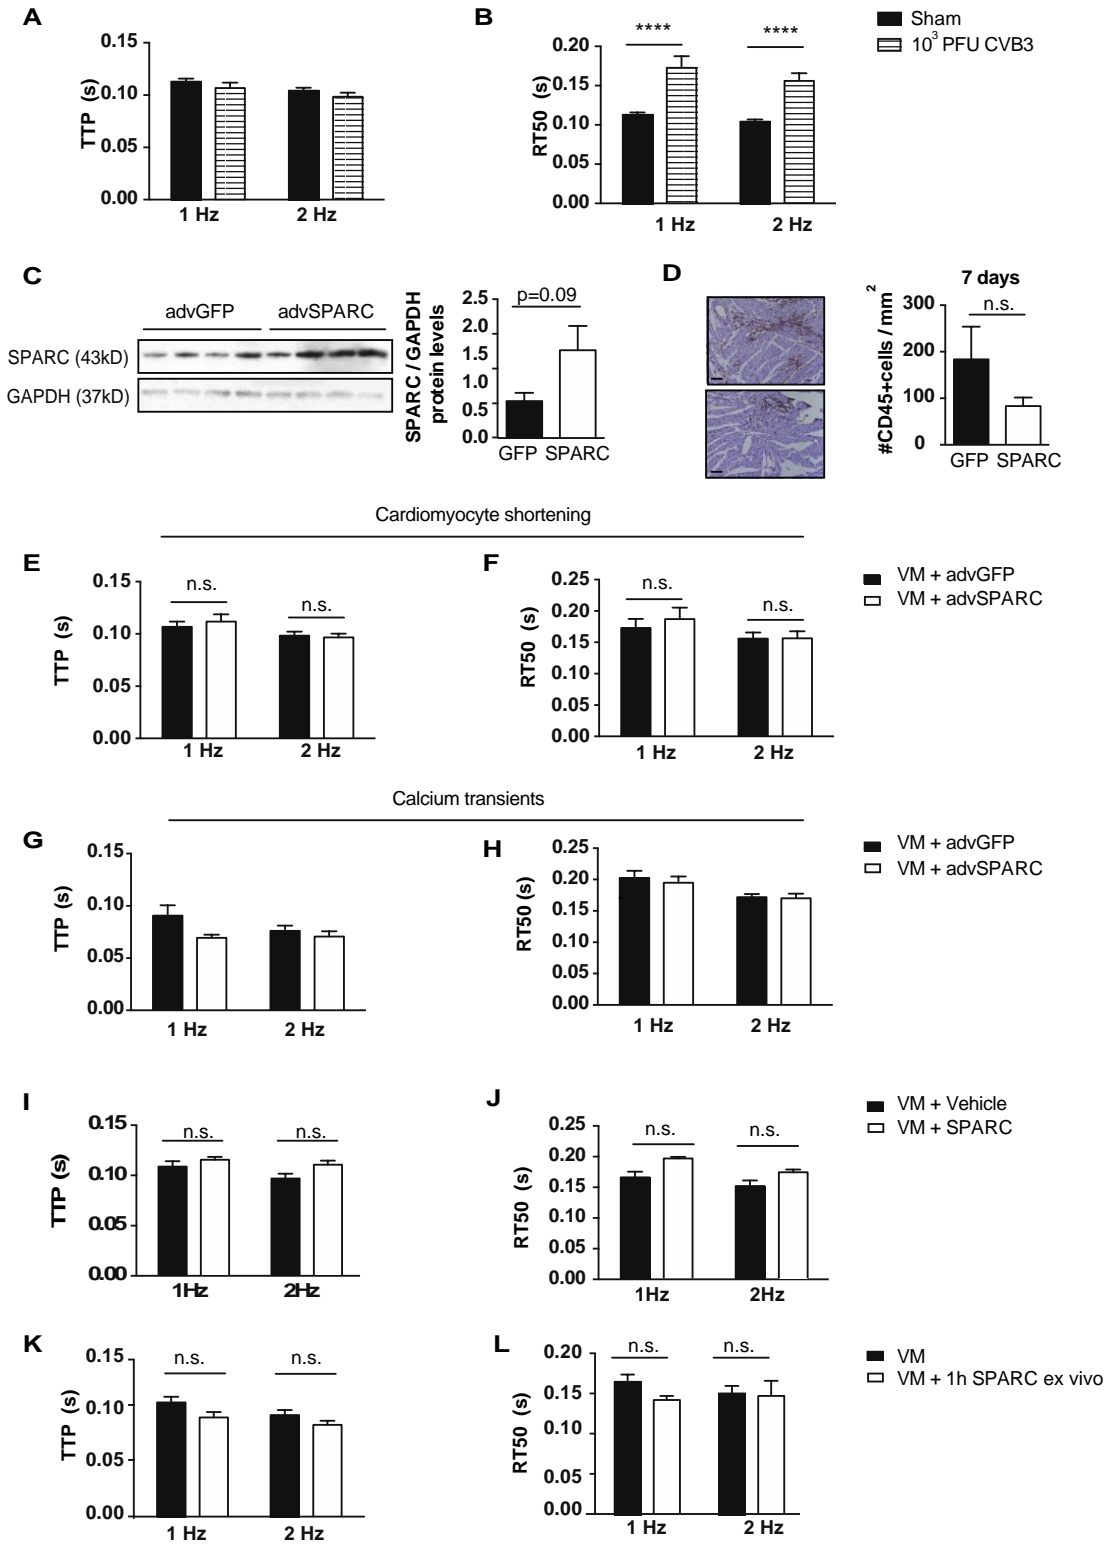

Source: https://www.biorxiv.org/content/10.1101/492363v1.full.pdf
